# Supplementary material for: Development of a framework and coding system for modifications and adaptations of evidence-based interventions
Source: Springer Nature journal article supplement (doi:10.1186/1748-5908-8-65), 2013-06-10
Supplement: 13012_2012_641_MOESM1_ESM.pdf [file 13012_2012_641_MOESM1_ESM.pdf]

316 abstracts reviewed

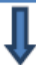

91 full text selected for further review

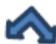

32 Articles Selected for Coding

59 Articles Excluded:

No specific information about  
modifications

Recommendations for adaptation  
process

Description of intervention development  
(rather than modification)
