# Supplementary material for: Development of a framework and coding system for modifications and adaptations of evidence-based interventions
Source: Springer Nature journal article supplement (doi:10.1186/1748-5908-8-65), 2013-06-10
Supplement: 13012_2012_641_MOESM2_ESM.pdf [file 13012_2012_641_MOESM2_ESM.pdf]

**BY WHOM are modifications made?**

- Individual practitioner/facilitator
- Team
- Non-program staff
- Administration
- Program developer/purveyor
- Researcher
- Coalition of stakeholders
- Unknown/unspecified

**WHAT is modified?**

Content  
(Modifications made to content itself, or that impact how aspects of the treatment are delivered)

Context  
(Modifications made to the way the overall treatment is delivered)

TRAINING AND EVALUATION  
(Modifications made to the way that staff are trained in or how the intervention is evaluated)

**At what LEVEL OF DELIVERY (for whom/what are modifications made?)**

- Individual patient level
- Group level
- Individual practitioner level
- Clinic/unit level
- Hospital level
- Network level
- System Level

**Context modifications are made to which of the following?**

- Format
- Setting
- Personnel
- Population

**What is the NATURE of the Content modification?**

- Tailoring/tweaking/refining
- Adding elements
- Removing/skipping elements
- Shortening/condensing (pacing/timing)
- Lengthening/extending (pacing/timing)
- Substituting
- Reordering of intervention modules or segments
- Integrating the intervention into another framework (*e.g.*, selecting elements)
- Integrating another treatment into EBP (not using the whole protocol and integrating other techniques into a general EBP approach)
- Repeating elements or modules
- Loosening structure
- Departing from the intervention ('drift')
